# Supplementary material for: Data on New Intermediate and Accidental Hosts Naturally Infected with Angiostrongylus cantonensis in La Gomera and Gran Canaria (Canary Islands, Spain)
Source: MDPI journal article supplement (doi:10.3390/ani13121969), 2023-06-13
Supplement: s1 [file s1]

**Table S1.** Quantification of the DNA obtained in the study samples.

| Sample code | Host specie        | Island    | Municipality   | ng/ $\mu$ l ADN | Dilution used | Result Nested-PCR | Sequences Acc. Number |
|-------------|--------------------|-----------|----------------|-----------------|---------------|-------------------|-----------------------|
| FcH1        | <i>Felis catus</i> | La Gomera | Vallehermoso   | 10.28           | -             | Negative          | -                     |
| FcH2        | <i>Felis catus</i> | La Gomera | Vallehermoso   | 16.36           | -             | Negative          | -                     |
| FcH3        | <i>Felis catus</i> | La Gomera | Valle Gran Rey | 1534.38         | 1:80          | Negative          | -                     |
| FcH4        | <i>Felis catus</i> | La Gomera | Vallehermoso   | 71.99           | 1:5           | Negative          | -                     |
| FcH5        | <i>Felis catus</i> | La Gomera | Alajeró        | 675.61          | 1:50          | Negative          | -                     |
| FcH6        | <i>Felis catus</i> | La Gomera | Vallehermoso   | 39.62           | -             | Negative          | -                     |
| FcH7        | <i>Felis catus</i> | La Gomera | Hermigua       | 1414.88         | 1:80          | Negative          | -                     |
| FcH8        | <i>Felis catus</i> | La Gomera | Vallehermoso   | 9.89            | -             | Negative          | -                     |
| FcH9        | <i>Felis catus</i> | La Gomera | Vallehermoso   | 59.57           | 1:5           | <b>Positive</b>   | *                     |
| FcH10       | <i>Felis catus</i> | La Gomera | Vallehermoso   | 7.63            | -             | <b>Positive</b>   | OQ702313              |
| FcH11       | <i>Felis catus</i> | La Gomera | Vallehermoso   | 15.76           | -             | Negative          | -                     |
| FcH12       | <i>Felis catus</i> | La Gomera | Vallehermoso   | 9.88            | -             | <b>Positive</b>   | *                     |
| FcH13       | <i>Felis catus</i> | La Gomera | Vallehermoso   | 26.77           | -             | Negative          | -                     |
| FcH14       | <i>Felis catus</i> | La Gomera | Vallehermoso   | 8.15            | -             | Negative          | -                     |
| FcH15       | <i>Felis catus</i> | La Gomera | Vallehermoso   | 39.55           | 1:5           | <b>Positive</b>   | *                     |
| FcH16       | <i>Felis catus</i> | La Gomera | Vallehermoso   | 9.75            | -             | Negative          | -                     |
| FcH17       | <i>Felis catus</i> | La Gomera | Vallehermoso   | 3.45            | -             | Negative          | -                     |
| FcH18       | <i>Felis catus</i> | La Gomera | Vallehermoso   | 72.51           | 1:10          | <b>Positive</b>   | OQ702314              |
| FcH19       | <i>Felis catus</i> | La Gomera | Hermigua       | 6.61            | -             | Negative          | -                     |
| FcH20       | <i>Felis catus</i> | La Gomera | Vallehermoso   | 287.53          | 1:30          | Negative          | -                     |
| FcH21       | <i>Felis catus</i> | La Gomera | Valle Gran Rey | 253.87          | 1:25          | Negative          | -                     |

| Sample code | Host specie          | Island    | Municipality   | ng/μl ADN | Dilution used | Result Nested-PCR | Sequences Acc. Number |
|-------------|----------------------|-----------|----------------|-----------|---------------|-------------------|-----------------------|
| FcH22       | <i>Felis catus</i>   | La Gomera | Valle Gran Rey | 565.88    | 1:50          | Negative          | -                     |
| FcH23       | <i>Felis catus</i>   | La Gomera | Valle Gran Rey | 49.45     | -             | Negative          | -                     |
| FcH24       | <i>Felis catus</i>   | La Gomera | Vallehermoso   | 64.20     | 1:5           | Negative          | -                     |
| FcH25       | <i>Felis catus</i>   | La Gomera | Vallehermoso   | 1401.63   | 1:95          | Negative          | -                     |
| FcH26       | <i>Felis catus</i>   | La Gomera | Agulo          | 538       | 1:40          | Negative          | -                     |
| FcH27       | <i>Felis catus</i>   | La Gomera | Vallehermoso   | 683       | 1:50          | Negative          | -                     |
| FcH28       | <i>Felis catus</i>   | La Gomera | Agulo          | 883       | 1:70          | Negative          | -                     |
| FcH29       | <i>Felis catus</i>   | La Gomera | Vallehermoso   | 717       | 1:65          | Negative          | -                     |
| FcH30       | <i>Felis catus</i>   | La Gomera | Vallehermoso   | 865       | 1:60          | Negative          | -                     |
| FcH31       | <i>Felis catus</i>   | La Gomera | Vallehermoso   | 398.52    | 1:30          | Negative          | -                     |
| FcH32       | <i>Felis catus</i>   | La Gomera | Vallehermoso   | 1169.89   | 1:100         | Negative          | -                     |
| FcH33       | <i>Felis catus</i>   | La Gomera | Hermigua       | 650.04    | 1:60          | Negative          | -                     |
| FcH34       | <i>Felis catus</i>   | La Gomera | Vallehermoso   | 219.78    | 1:20          | Negative          | -                     |
| FcH35       | <i>Felis catus</i>   | La Gomera | Hermigua       | 318.27    | 1:30          | Negative          | -                     |
| FcH36       | <i>Felis catus</i>   | La Gomera | Hermigua       | 503.86    | 1:50          | Negative          | -                     |
| FcH37       | <i>Felis catus</i>   | La Gomera | Valle Gran Rey | 25.59     | 1:20          | Negative          | -                     |
| FcH38       | <i>Felis catus</i>   | La Gomera | Hermigua       | 336.52    | 1:30          | Negative          | -                     |
| FcH39       | <i>Felis catus</i>   | La Gomera | Hermigua       | 206.58    | 1:20          | Negative          | -                     |
| FcH40       | <i>Felis catus</i>   | La Gomera | Hermigua       | 596.64    | 1:50          | Negative          | -                     |
| RH1         | <i>Rattus rattus</i> | La Gomera | Hermigua       | 289.73    | 1:30          | Negative          | -                     |
| RH2         | <i>Rattus rattus</i> | La Gomera | Hermigua       | 1860      | 1:200         | Negative          | -                     |
| RH3         | <i>Rattus rattus</i> | La Gomera | Hermigua       | 1705      | 1:179         | Negative          | -                     |
| RH4         | <i>Mus musculus</i>  | La Gomera | Hermigua       | 3207      | 1:309         | Negative          | -                     |

| Sample code | Host specie              | Island       | Municipality          | ng/μl ADN | Dilution used | Result Nested-PCR | Sequences Acc. Number |
|-------------|--------------------------|--------------|-----------------------|-----------|---------------|-------------------|-----------------------|
| RH5         | <i>Mus musculus</i>      | La Gomera    | Hermigua              | 533       | 1:50          | Negative          | -                     |
| RH6         | <i>Mus musculus</i>      | La Gomera    | Hermigua              | 489       | 1:50          | Negative          | -                     |
| RH7         | <i>Rattus rattus</i>     | La Gomera    | Hermigua              | 574       | 1:50          | Negative          | -                     |
| RH8         | <i>Rattus rattus</i>     | La Gomera    | San Sebastián de L.G. | 1179      | 1:110         | Negative          | -                     |
| RH9         | <i>Mus musculus</i>      | La Gomera    | Alajeró               | 1550      | 1:120         | Negative          | -                     |
| RH10        | <i>Mus musculus</i>      | La Gomera    | Alajeró               | 2310      | 1:180         | Negative          | -                     |
| RH11        | <i>Mus musculus</i>      | La Gomera    | Alajeró               | 3821      | 1:300         | Negative          | -                     |
| RH12        | <i>Rattus rattus</i>     | La Gomera    | Alajeró               | 1673      | 1:17          | Negative          | -                     |
| RH13        | <i>Rattus norvegicus</i> | La Gomera    | Hermigua              | 511       | 1:50          | Negative          | -                     |
| RH14        | <i>Rattus rattus</i>     | La Gomera    | Hermigua              | 667       | 1:50          | Negative          | -                     |
| RH15        | <i>Rattus norvegicus</i> | La Gomera    | Hermigua              | 342       | 1:40          | Negative          | -                     |
| RH16        | <i>Rattus rattus</i>     | La Gomera    | Hermigua              | 1400      | 1:100         | Negative          | -                     |
| RH17        | <i>Rattus norvegicus</i> | La Gomera    | Hermigua              | 6.76      | -             | Negative          | -                     |
| RH18        | <i>Mus musculus</i>      | La Gomera    | Hermigua              | 784       | 1:60          | Negative          | -                     |
| RH19        | <i>Mus musculus</i>      | La Gomera    | Hermigua              | 667       | 1:70          | Negative          | -                     |
| RH20        | <i>Mus musculus</i>      | La Gomera    | Hermigua              | 297       | 1:30          | Negative          | -                     |
| RH21        | <i>Mus musculus</i>      | La Gomera    | Hermigua              | 290       | 1:30          | Negative          | -                     |
| RH22        | <i>Mus musculus</i>      | Gran Canaria | Ingenio               | 3252      | 1:310         | Negative          | -                     |
| RH23        | <i>Mus musculus</i>      | Gran Canaria | Ingenio               | 1271      | 1:130         | Negative          | -                     |
| RH24        | <i>Mus musculus</i>      | Gran Canaria | Ingenio               | 4720      | 1:410         | <b>Positive</b>   | OQ702304              |
| RH25        | <i>Mus musculus</i>      | Gran Canaria | Ingenio               | 1627      | 1:120         | Negative          | -                     |
| RH26        | <i>Mus musculus</i>      | Gran Canaria | Ingenio               | 2617      | 1:120         | Negative          | -                     |
| RH27        | <i>Mus musculus</i>      | Gran Canaria | Ingenio               | 5140      | 1:510         | Negative          | -                     |

| Sample code | Host specie              | Island       | Municipality | ng/μl<br>ADN | Dilution<br>used | Result<br>Nested-PCR | Sequences<br>Acc. Number |
|-------------|--------------------------|--------------|--------------|--------------|------------------|----------------------|--------------------------|
| RH28        | <i>Mus musculus</i>      | Gran Canaria | Ingenio      | 6756         | 1:610            | Negative             | -                        |
| RH29        | <i>Rattus rattus</i>     | Gran Canaria | Ingenio      | 4156         | 1:410            | Negative             | -                        |
| RH30        | <i>Mus musculus</i>      | Gran Canaria | Artenara     | 2779         | 1:210            | Negative             | -                        |
| RH31        | <i>Mus musculus</i>      | Gran Canaria | Artenara     | 226          | 1:210            | Negative             | -                        |
| RH32        | <i>Mus musculus</i>      | Gran Canaria | Ingenio      | 800          | 1:50             | Negative             | -                        |
| RH33        | <i>Mus musculus</i>      | Gran Canaria | Ingenio      | 1027         | 1:100            | <b>Positive</b>      | OQ702312                 |
| RH34        | <i>Mus musculus</i>      | Gran Canaria | Ingenio      | 1261         | 1:200            | Negative             | -                        |
| RH35        | <i>Mus musculus</i>      | Gran Canaria | Ingenio      | 2468         | 1:210            | Negative             | -                        |
| RH36        | <i>Mus musculus</i>      | Gran Canaria | Ingenio      | 2871         | 1:250            | <b>Positive</b>      | *                        |
| RH37        | <i>Rattus rattus</i>     | Gran Canaria | Ingenio      | 4334         | 1:410            | Negative             | -                        |
| RH38        | <i>Mus musculus</i>      | Gran Canaria | Arucas       | 2725         | 1:210            | Negative             | -                        |
| RH39        | <i>Mus musculus</i>      | Gran Canaria | Arucas       | 377          | 1:110            | Negative             | -                        |
| RH40        | <i>Mus musculus</i>      | Gran Canaria | Arucas       | 587          | 1:50             | Negative             | -                        |
| RH41        | <i>Mus musculus</i>      | Gran Canaria | Arucas       | 604          | 1:60             | Negative             | -                        |
| RH42        | <i>Mus musculus</i>      | Gran Canaria | Arucas       | 1265         | 1:200            | Negative             | -                        |
| RH43        | <i>Rattus rattus</i>     | Gran Canaria | Arucas       | 2219         | 1:210            | Negative             | -                        |
| RH44        | <i>Mus musculus</i>      | La Gomera    | Vallehermoso | 4720         | 1:450            | Negative             | -                        |
| RH45        | <i>Mus musculus</i>      | La Gomera    | Vallehermoso | 907          | 1:90             | Negative             | -                        |
| RH46        | <i>Rattus rattus</i>     | La Gomera    | Vallehermoso | 2281         | 1:130            | Negative             | -                        |
| RH47        | <i>Rattus norvegicus</i> | La Gomera    | Vallehermoso | 1544         | 1:149            | Negative             | -                        |
| RH48        | <i>Rattus rattus</i>     | La Gomera    | Vallehermoso | 5277         | 1:500            | Negative             | -                        |
| RH49        | <i>Rattus rattus</i>     | La Gomera    | Vallehermoso | 1677         | 1:150            | Negative             | -                        |
| RH50        | <i>Mus musculus</i>      | La Gomera    | Vallehermoso | 3219         | 1:130            | Negative             | -                        |

| Sample code | Host specie          | Island       | Municipality   | ng/μl<br>ADN | Dilution<br>used | Result<br>Nested-PCR | Sequences<br>Acc. Number |
|-------------|----------------------|--------------|----------------|--------------|------------------|----------------------|--------------------------|
| RH51        | <i>Mus musculus</i>  | La Gomera    | Vallehermoso   | 1607         | 1:150            | Negative             | -                        |
| RH52        | <i>Mus musculus</i>  | La Gomera    | Vallehermoso   | 2234         | 1:210            | Negative             | -                        |
| RH53        | <i>Rattus rattus</i> | La Gomera    | Vallehermoso   | 2338         | 1:210            | Negative             | -                        |
| RH54        | <i>Rattus rattus</i> | La Gomera    | Vallehermoso   | 668          | 1:60             | Negative             | -                        |
| RH55        | <i>Mus musculus</i>  | Gran Canaria | Ingenio        | 2016.20      | 1:120            | <b>Positive</b>      | *                        |
| RH56        | <i>Mus musculus</i>  | Gran Canaria | Ingenio        | 768.41       | 1:70             | <b>Positive</b>      | *                        |
| RH57        | <i>Mus musculus</i>  | Gran Canaria | Ingenio        | 1013.16      | 1:100            | <b>Positive</b>      | *                        |
| RH58        | <i>Mus musculus</i>  | Gran Canaria | Ingenio        | 875.47       | 1:80             | Negative             | -                        |
| RH59        | <i>Mus musculus</i>  | Gran Canaria | Ingenio        | 234.75       | 1:120            | <b>Positive</b>      | *                        |
| RH60        | <i>Rattus rattus</i> | Gran Canaria | Ingenio        | 873.18       | 1:80             | Negative             | -                        |
| RH61        | <i>Rattus rattus</i> | Gran Canaria | Ingenio        | 1691.03      | 1:130            | Negative             | -                        |
| RH62        | <i>Rattus rattus</i> | Gran Canaria | Ingenio        | 1022.66      | 1:100            | Negative             | -                        |
| RH63        | <i>Rattus rattus</i> | Gran Canaria | Ingenio        | 3855.67      | 1:300            | Negative             | -                        |
| RH64        | <i>Mus musculus</i>  | Gran Canaria | Firgas         | 1525.76      | 1:110            | <b>Positive</b>      | *                        |
| RH65        | <i>Mus musculus</i>  | Gran Canaria | Arucas         | 2629.43      | 1:120            | <b>Positive</b>      | *                        |
| RH66        | <i>Rattus rattus</i> | La Gomera    | Hermigua       | 1696.12      | 1:100            | Negative             | -                        |
| RH67        | <i>Rattus rattus</i> | La Gomera    | Hermigua       | 919.52       | 1:40             | <b>Positive</b>      | OQ702305                 |
| RH68        | <i>Rattus rattus</i> | La Gomera    | Valle Gran Rey | 1163.28      | 1:60             | Negative             | -                        |
| RH69        | <i>Rattus rattus</i> | La Gomera    | Valle Gran Rey | 571.44       | 1:20             | Negative             | -                        |
| RH70        | <i>Rattus rattus</i> | La Gomera    | Valle Gran Rey | 402.40       | 1:20             | Negative             | -                        |
| RH71        | <i>Rattus rattus</i> | La Gomera    | Valle Gran Rey | 506.54       | 1:25             | Negative             | -                        |
| RH72        | <i>Rattus rattus</i> | La Gomera    | Valle Gran Rey | 1097.19      | 1:50             | Negative             | -                        |
| RH73        | <i>Rattus rattus</i> | La Gomera    | Hermigua       | 737.24       | 1:30             | Negative             | -                        |

| Sample code | Host specie          | Island    | Municipality          | ng/μl<br>ADN | Dilution<br>used | Result<br>Nested-PCR | Sequences<br>Acc. Number |
|-------------|----------------------|-----------|-----------------------|--------------|------------------|----------------------|--------------------------|
| RH74        | <i>Rattus rattus</i> | La Gomera | Hermigua              | 68.11        | -                | Negative             | -                        |
| RH75        | <i>Rattus rattus</i> | La Gomera | San Sebastián de L.G. | 10793.87     | 1:50             | Negative             | -                        |
| RH76        | <i>Rattus rattus</i> | La Gomera | San Sebastián de L.G. | 574.38       | 1:30             | Negative             | -                        |
| RH77        | <i>Rattus rattus</i> | La Gomera | San Sebastián de L.G. | 407.48       | 1:20             | Negative             | -                        |
| RH78        | <i>Mus musculus</i>  | La Gomera | San Sebastián de L.G. | 2024.63      | 1:100            | Negative             | -                        |
| RH79        | <i>Mus musculus</i>  | La Gomera | San Sebastián de L.G. | 1545.60      | 1:80             | Negative             | -                        |
| RH80        | <i>Rattus rattus</i> | La Gomera | Agulo                 | 1198.36      | 1:50             | Negative             | -                        |
| RH81        | <i>Rattus rattus</i> | La Gomera | Agulo                 | 330.02       | 1:15             | Negative             | -                        |
| RH82        | <i>Mus musculus</i>  | La Gomera | Agulo                 | 1100.57      | 1:50             | Negative             | -                        |
| RH83        | <i>Mus musculus</i>  | La Gomera | Agulo                 | 482.28       | 1:20             | Negative             | -                        |
| RH84        | <i>Mus musculus</i>  | La Gomera | Agulo                 | 377.03       | 1:15             | Negative             | -                        |
| RH85        | <i>Rattus rattus</i> | La Gomera | Hermigua              | 2169.72      | 1:100            | Negative             | -                        |
| RH86        | <i>Rattus rattus</i> | La Gomera | Hermigua              | 114.43       | 1:5              | Negative             | -                        |
| RH87        | <i>Mus musculus</i>  | La Gomera | Hermigua              | 1510.14      | 1:80             | Negative             | -                        |
| RH88        | <i>Mus musculus</i>  | La Gomera | Hermigua              | 761.98       | 1:40             | Negative             | -                        |
| RH89        | <i>Mus musculus</i>  | La Gomera | Hermigua              | 716.46       | 1:30             | Negative             | -                        |
| RH90        | <i>Mus musculus</i>  | La Gomera | Hermigua              | 2032.36      | 1:90             | Negative             | -                        |
| RH91        | <i>Mus musculus</i>  | La Gomera | Hermigua              | 235.38       | 1:10             | Negative             | -                        |
| RH92        | <i>Mus musculus</i>  | La Gomera | San Sebastián de L.G. | 2637.99      | 1:100            | Negative             | -                        |
| RH93        | <i>Mus musculus</i>  | La Gomera | San Sebastián de L.G. | 1295.93      | 1:60             | Negative             | -                        |
| RH94        | <i>Mus musculus</i>  | La Gomera | San Sebastián de L.G. | 253.07       | 1:10             | Negative             | -                        |
| RH95        | <i>Mus musculus</i>  | La Gomera | San Sebastián de L.G. | 1380.43      | 1:60             | Negative             | -                        |
| RH96        | <i>Ratus rattus</i>  | La Gomera | San Sebastián de L.G. | 1456.06      | 1:70             | Negative             | -                        |

| Sample code | Host specie                    | Island    | Municipality | ng/μl ADN | Dilution used | Result Nested-PCR | Sequences Acc. Number |
|-------------|--------------------------------|-----------|--------------|-----------|---------------|-------------------|-----------------------|
| RH97        | <i>Mus musculus</i>            | La Gomera | Hermigua     | 335.13    | 1:15          | Negative          | -                     |
| RH98        | <i>Mus musculus</i>            | La Gomera | Hermigua     | 6918.97   | 1:300         | Negative          | -                     |
| RH99        | <i>Mus musculus</i>            | La Gomera | Hermigua     | 77.25     | -             | Negative          | -                     |
| RH100       | <i>Rattus rattus</i>           | La Gomera | Hermigua     | 210.36    | 1:10          | Negative          | -                     |
| RH101       | <i>Rattus rattus</i>           | La Gomera | Hermigua     | 265.81    | 1:20          | Negative          | -                     |
| RH102       | <i>Mus musculus</i>            | La Gomera | Agulo        | 1165.44   | 1:50          | Negative          | -                     |
| RH103       | <i>Rattus rattus</i>           | La Gomera | Agulo        | 2409.57   | 1:100         | Negative          | -                     |
| RH104       | <i>Mus musculus</i>            | La Gomera | Agulo        | 20.53     | 1:70          | Negative          | -                     |
| BAB1-01     | <i>Insulivitrina emmersoni</i> | La Gomera | Vallehermoso | 775       | 1:70          | Negative          | -                     |
| BAB1-02     | <i>Insulivitrina emmersoni</i> | La Gomera | Vallehermoso | 1325      | 1:110         | Negative          | -                     |
| BAB1-03     | <i>Insulivitrina emmersoni</i> | La Gomera | Vallehermoso | 1481      | 1:120         | Negative          | -                     |
| BAB1-04     | <i>Insulivitrina emmersoni</i> | La Gomera | Vallehermoso | 1696      | 1:170         | <b>Positive</b>   | *                     |
| BAB1-05     | <i>Insulivitrina emmersoni</i> | La Gomera | Vallehermoso | 1056      | 1:100         | Negative          | -                     |
| BAB1-06     | <i>Insulivitrina emmersoni</i> | La Gomera | Vallehermoso | 1007      | 1:00          | Negative          | -                     |
| BAB1-07     | <i>Insulivitrina emmersoni</i> | La Gomera | Vallehermoso | 1243      | 1:100         | <b>Positive</b>   | OQ702315              |
| BAB1-08     | <i>Insulivitrina emmersoni</i> | La Gomera | Vallehermoso | 1370      | 1:130         | Negative          | -                     |
| BAB1-09     | <i>Insulivitrina emmersoni</i> | La Gomera | Vallehermoso | 885       | 1:80          | Negative          | -                     |
| BAB1-10     | <i>Insulivitrina emmersoni</i> | La Gomera | Vallehermoso | 1352      | 1:130         | <b>Positive</b>   | OQ702306              |
| BAB1-11     | <i>Insulivitrina emmersoni</i> | La Gomera | Vallehermoso | 1492.86   | 1:110         | Negative          | -                     |
| BAB2-01     | <i>Insulivitrina emmersoni</i> | La Gomera | Vallehermoso | 574.15    | 1:40          | Negative          | -                     |
| BAB2-02     | <i>Insulivitrina emmersoni</i> | La Gomera | Vallehermoso | 445.53    | 1:20          | Negative          | -                     |
| BAB2-03     | <i>Insulivitrina emmersoni</i> | La Gomera | Vallehermoso | 921.30    | 1:50          | Negative          | -                     |
| BAB2-04     | <i>Insulivitrina emmersoni</i> | La Gomera | Vallehermoso | 1314.62   | 1:60          | <b>Positive</b>   | OQ702316              |

| Sample code | Host specie                    | Island       | Municipality | ng/μl<br>AND | Dilution<br>used | Result<br>Nested-PCR | Sequences<br>Acc. Number |
|-------------|--------------------------------|--------------|--------------|--------------|------------------|----------------------|--------------------------|
| BAB2-05     | <i>Insulivitrina emmersoni</i> | La Gomera    | Vallehermoso | 603.02       | 1:30             | Negative             | -                        |
| BAB2-06     | <i>Insulivitrina emmersoni</i> | La Gomera    | Vallehermoso | 1534.86      | 1:90             | Negative             | -                        |
| BAB2-07     | <i>Insulivitrina emmersoni</i> | La Gomera    | Vallehermoso | 948.03       | 1:50             | Negative             | -                        |
| BAB3-01     | <i>Insulivitrina emmersoni</i> | La Gomera    | Vallehermoso | 1921.14      | 1:150            | <b>Positive</b>      | *                        |
| BAB3-02     | <i>Insulivitrina emmersoni</i> | La Gomera    | Vallehermoso | 1616.40      | 1:130            | Negative             | -                        |
| BAB3-03     | <i>Insulivitrina emmersoni</i> | La Gomera    | Vallehermoso | 1808.68      | 1:140            | <b>Positive</b>      | *                        |
| BAB3-04     | <i>Insulivitrina emmersoni</i> | La Gomera    | Vallehermoso | 1175.73      | 1:110            | Negative             | -                        |
| BAB3-05     | <i>Insulivitrina emmersoni</i> | La Gomera    | Vallehermoso | 1959.59      | 1:150            | <b>Positive</b>      | *                        |
| BAB3-06     | <i>Insulivitrina emmersoni</i> | La Gomera    | Vallehermoso | 2006.29      | 1:200            | Negative             | -                        |
| BAB3-07     | <i>Insulivitrina emmersoni</i> | La Gomera    | Vallehermoso | 433.57       | 1:50             | <b>Positive</b>      | *                        |
| BAB3-08     | <i>Insulivitrina emmersoni</i> | La Gomera    | Vallehermoso | 1066.50      | 1:100            | <b>Positive</b>      | *                        |
| BAB3-09     | <i>Insulivitrina emmersoni</i> | La Gomera    | Vallehermoso | 675.72       | 1:60             | Negative             | -                        |
| BAB3-10     | <i>Insulivitrina emmersoni</i> | La Gomera    | Vallehermoso | 850.84       | 1:80             | Negative             | -                        |
| BAB4-01     | <i>Insulivitrina emmersoni</i> | La Gomera    | Vallehermoso | 1943.92      | 1:100            | Negative             | -                        |
| BAB4-02     | <i>Insulivitrina emmersoni</i> | La Gomera    | Vallehermoso | 1624.91      | 1:90             | Negative             | -                        |
| GCG-01      | <i>Milax gagates</i>           | Gran Canaria | Firgas       | 393.20       | 1:30             | Negative             | -                        |
| GCG-02      | <i>Milax gagates</i>           | Gran Canaria | Firgas       | 627.82       | 1:60             | Negative             | -                        |
| GCG-03      | <i>Milax gagates</i>           | Gran Canaria | Firgas       | 3096.30      | 1:300            | Negative             | -                        |
| GCG-04      | <i>Milax gagates</i>           | Gran Canaria | Firgas       | 1121.08      | 1:100            | Negative             | -                        |
| GCG-05      | <i>Milax gagates</i>           | Gran Canaria | Firgas       | 555.01       | 1:50             | Negative             | -                        |
| GCG-06      | <i>Milax gagates</i>           | Gran Canaria | Firgas       | 1592.41      | 1:150            | <b>Positive</b>      | *                        |
| GCG-07      | <i>Milax gagates</i>           | Gran Canaria | Firgas       | 406.00       | 1:40             | Negative             | -                        |
| GCG-08      | <i>Milax gagates</i>           | Gran Canaria | Firgas       | 1451.76      | 1:120            | Negative             | -                        |



| Sample code | Host specie           | Island       | Municipality | ng/μl<br>AND | Dilution<br>used | Result<br>Nested-PCR | Sequences<br>Acc. Number |
|-------------|-----------------------|--------------|--------------|--------------|------------------|----------------------|--------------------------|
| GCG-09      | <i>Milax gagates</i>  | Gran Canaria | Firgas       | 959.94       | 1:90             | Negative             | -                        |
| GCG-10      | <i>Milax gagates</i>  | Gran Canaria | Firgas       | 186.69       | 1:10             | Negative             | -                        |
| GCP-01      | <i>Milax gagates</i>  | Gran Canaria | Firgas       | 494.01       | 1:40             | Negative             | -                        |
| GCP-02      | <i>Milax gagates</i>  | Gran Canaria | Firgas       | 392.13       | 1:30             | Negative             | -                        |
| GCP-03      | <i>Milax gagates</i>  | Gran Canaria | Firgas       | 503.46       | 1:50             | Negative             | -                        |
| GCP-04      | <i>Milax gagates</i>  | Gran Canaria | Firgas       | 496.58       | 1:40             | Negative             | -                        |
| GCP-05      | <i>Milax gagates</i>  | Gran Canaria | Firgas       | 293.31       | 1:20             | Negative             | -                        |
| GCP-06      | <i>Milax gagates</i>  | Gran Canaria | Firgas       | 650.12       | 1:60             | <b>Positive</b>      | OQ702310                 |
| GCP-07      | <i>Milax gagates</i>  | Gran Canaria | Firgas       | 268.44       | 1:20             | Negative             | -                        |
| GCP-08      | <i>Milax gagates</i>  | Gran Canaria | Firgas       | 206.02       | 1:20             | Negative             | -                        |
| GCP-09      | <i>Milax gagates</i>  | Gran Canaria | Firgas       | 179.40       | 1:10             | Negative             | -                        |
| GCP-10      | <i>Milax gagates</i>  | Gran Canaria | Firgas       | 283.42       | 1:20             | Negative             | -                        |
| GCR-01      | <i>Milax gagates</i>  | Gran Canaria | Firgas       | 270.01       | 1:20             | Negative             | -                        |
| GCR-02      | <i>Milax gagates</i>  | Gran Canaria | Firgas       | 829.61       | 1:80             | Negative             | -                        |
| GCR-03      | <i>Milax gagates</i>  | Gran Canaria | Firgas       | 996.80       | 1:90             | Negative             | -                        |
| GCR-04      | <i>Milax gagates</i>  | Gran Canaria | Firgas       | 1222.08      | 1:110            | Negative             | -                        |
| LG-Fla-01   | <i>Limacus flavus</i> | La Gomera    | Hermigua     | 4685         | 1:220            | <b>Positive</b>      | *                        |
| LG-Fla-02   | <i>Limacus flavus</i> | La Gomera    | Hermigua     | 2334         | 1:100            | Negative             | -                        |
| LG-Fla-03   | <i>Limacus flavus</i> | La Gomera    | Hermigua     | 834          | 1:40             | <b>Positive</b>      | OQ702307                 |
| LG-Fla-04   | <i>Limacus flavus</i> | La Gomera    | Hermigua     | 519          | 1:25             | Negative             | -                        |
| LG-Fla-05   | <i>Limacus flavus</i> | La Gomera    | Hermigua     | 638          | 1:30             | <b>Positive</b>      | *                        |
| LG-Fla-06   | <i>Limacus flavus</i> | La Gomera    | Hermigua     | 2673         | 1:120            | <b>Positive</b>      | OQ702308                 |
| LG-Fla-07   | <i>Limacus flavus</i> | La Gomera    | Hermigua     | 1278         | 1:5              | <b>Positive</b>      | OQ702309                 |

| Sample code | Host specie                 | Island    | Municipality   | ng/μl ADN | Dilution used | Result Nested-PCR | Sequences Acc. Number |
|-------------|-----------------------------|-----------|----------------|-----------|---------------|-------------------|-----------------------|
| LG-Fla-08   | <i>Limacus flavus</i>       | La Gomera | Hermigua       | 901       | 1:40          | <b>Positive</b>   | OQ702317              |
| LG-Fla-09   | <i>Limacus flavus</i>       | La Gomera | Hermigua       | 3107      | 1:120         | Negative          | -                     |
| LG-Fla-10   | <i>Limacus flavus</i>       | La Gomera | Hermigua       | 446       | 1:20          | Negative          | -                     |
| LG-Orom-01  | <i>Insulivitrina oromii</i> | La Gomera | Hermigua       | 282       | 1:10          | <b>Positive</b>   | OQ702311              |
| LG-Orom-02  | <i>Insulivitrina oromii</i> | La Gomera | Hermigua       | 1630      | 1:80          | Negative          | -                     |
| LG-Orom-03  | <i>Insulivitrina oromii</i> | La Gomera | Hermigua       | 537       | 1:20          | <b>Positive</b>   | OQ702318              |
| LG-Orom-04  | <i>Insulivitrina oromii</i> | La Gomera | Agulo          | 444       | 1:20          | <b>Positive</b>   | OQ702319              |
| LG-Orom-05  | <i>Insulivitrina oromii</i> | La Gomera | Agulo          | 1041      | 1:50          | Negative          | -                     |
| LG-Orom-06  | <i>Insulivitrina oromii</i> | La Gomera | Alajeró        | 140       | -             | Negative          | -                     |
| LG-Orom-07  | <i>Insulivitrina oromii</i> | La Gomera | Alajeró        | 361       | 1:20          | Negative          | -                     |
| LG-Orom-08  | <i>Insulivitrina oromii</i> | La Gomera | Valle Gran Rey | 289       | 1:10          | Negative          | -                     |

\* The sequences obtained were not of sufficient quality for phylogenetic analyses.
